# Supplementary material for: Asymmetric synthesis of (1R,2S)-1-amino-2-vinylcyclopropanecarboxylic acid by sequential SN2–SN2′ dialkylation of (R)-N-(benzyl)proline-derived glycine Schiff base Ni(ii) complex
Source: Royal Society of Chemistry journal article supplement (doi:10.1039/c4ra12658k), 2014-11-24
Supplement: c4ra12658k1.pdf [file c4ra12658k1.pdf]

## Supporting Information

### Asymmetric synthesis of (1*R*,2*S*)-1-amino-2-vinylcyclopropanecarboxylic acid by sequential S<sub>N</sub>2–S<sub>N</sub>2' dialkylation of (*R*)-*N*-(benzyl)proline-derived glycine Schiff base Ni(II) complex

Aki Kawashima,<sup>a</sup> Chen Xie,<sup>b</sup> Haibo Mei,<sup>b</sup> Ryosuke Takeda,<sup>a</sup> Akie Kawamura,<sup>a</sup> Tatsunori Sato,<sup>a</sup> Hiroki Moriwaki,<sup>a</sup> Kunisuke Izawa,<sup>a</sup> Jianlin Han,<sup>\*b</sup> José Luis Aceña<sup>\*c</sup> and Vadim A. Soloshonok<sup>\*c,d</sup>

<sup>a</sup> Hamari Chemicals Ltd. 1-4-29 Kunijima, Higashi-Yodogawa-ku, Osaka, Japan 533-0024

<sup>b</sup> School of Chemistry and Chemical Engineering, Nanjing University, Nanjing, 210093, China

<sup>c</sup> Department of Organic Chemistry I, Faculty of Chemistry, University of the Basque Country UPV/EHU, Paseo Manuel Lardizábal 3, 20018 San Sebastián, Spain

<sup>d</sup> IKERBASQUE, Basque Foundation for Science, María Díaz de Haro 3, 48013 Bilbao, Spain

## CONTENTS

|                                                          |     |
|----------------------------------------------------------|-----|
| Copies of <sup>1</sup> H and <sup>13</sup> C NMR spectra | S2  |
| HPLC analysis of (1 <i>R</i> ,2 <i>S</i> )-15            | S10 |

$^1\text{H}$  NMR of (*S*)(2*S*)-**9** (300 MHz,  $\text{CDCl}_3$ ):

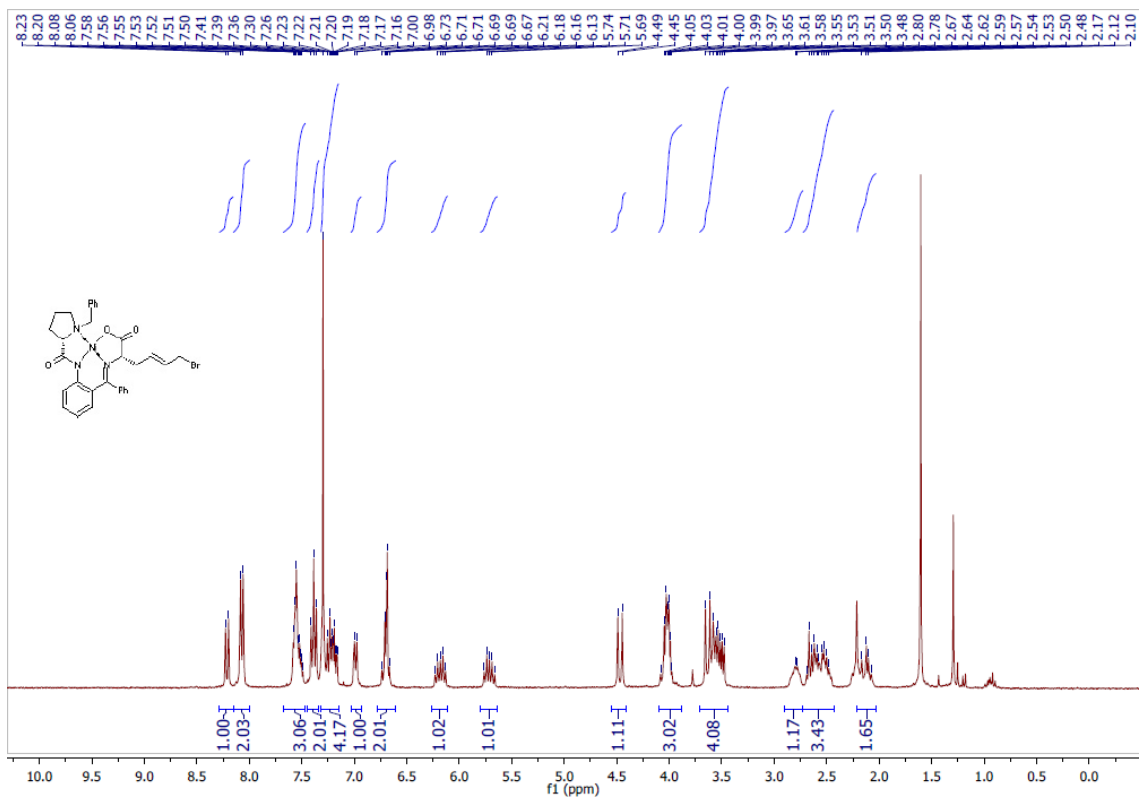

$^{13}\text{C}$  NMR of (*S*)(2*S*)-**9** (75.5 MHz,  $\text{CDCl}_3$ ):

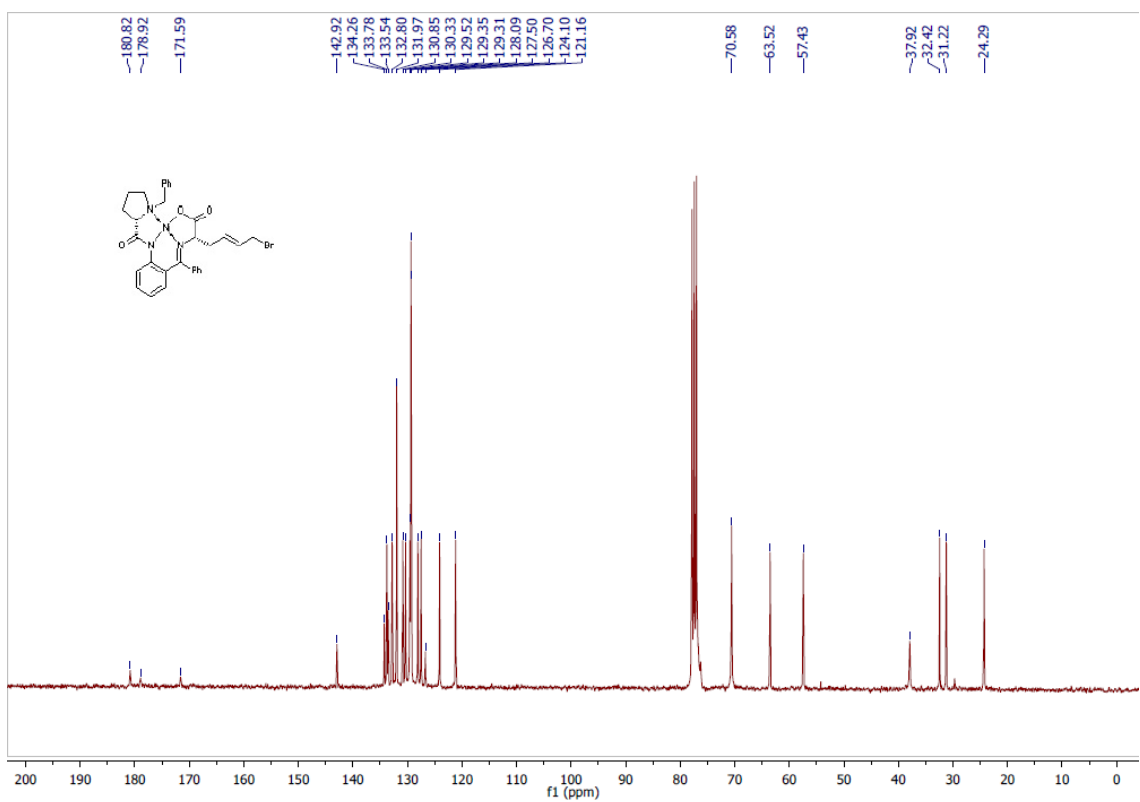

$^1\text{H}$  NMR of (*R*)(2*R*)-**9** and (*R*)(2*S*)-**10** (300 MHz,  $\text{CDCl}_3$ ):

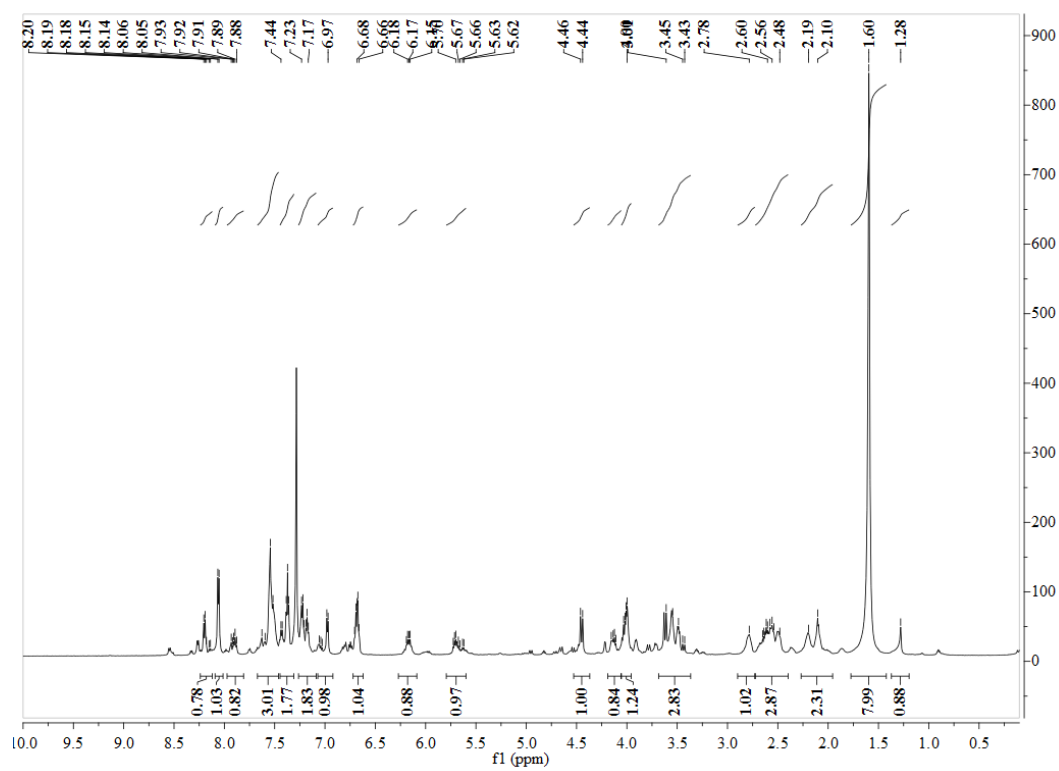

$^1\text{H}$  NMR of (*S*)(2*S*,3*R*)-**11** (300 MHz,  $\text{CDCl}_3$ ):

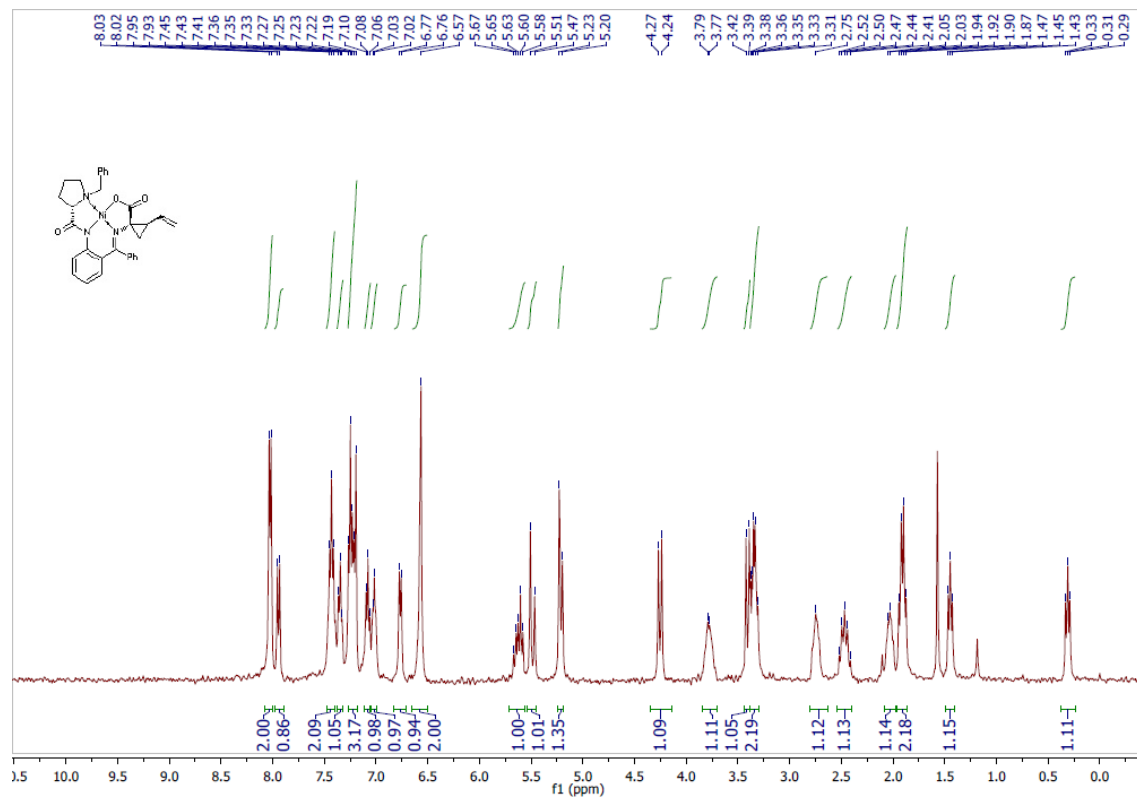

$^{13}\text{C}$  NMR of (*S*)(2*S*,3*R*)-**11** (75.5 MHz,  $\text{CDCl}_3$ ):

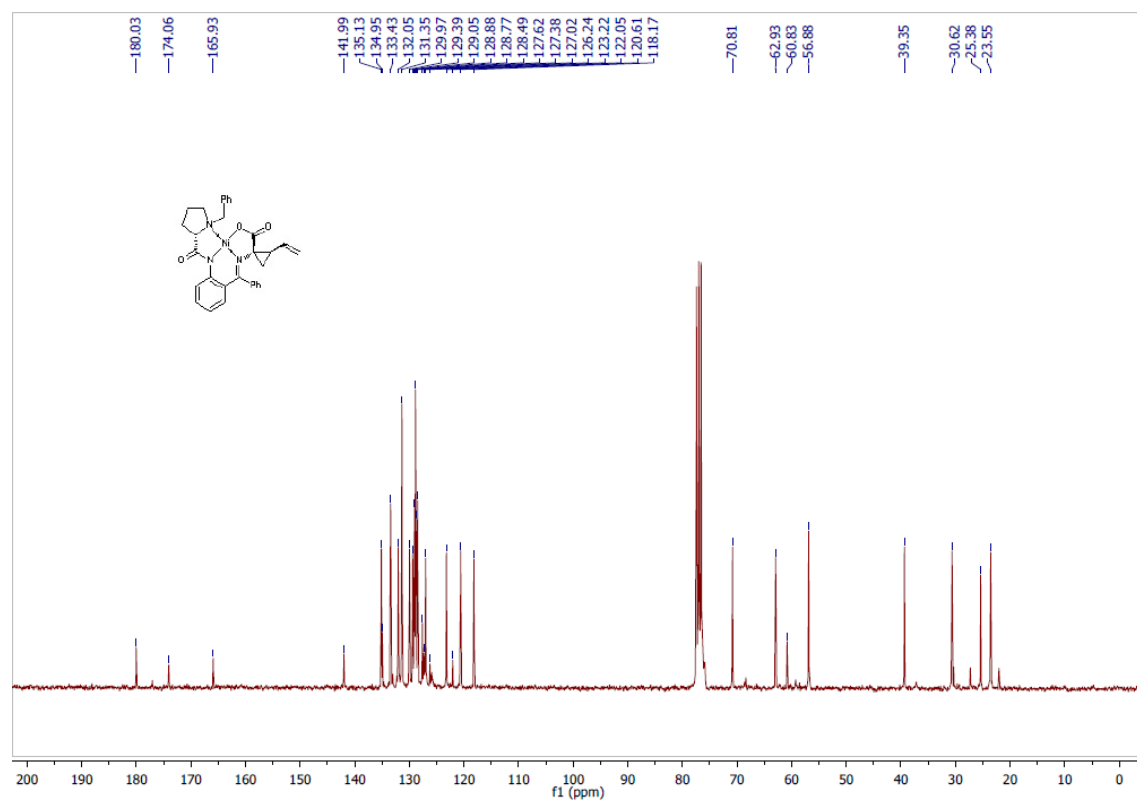

$^1\text{H}$  NMR of (*S*)(2*R*,3*S*)-**12** (300 MHz,  $\text{CDCl}_3$ ):

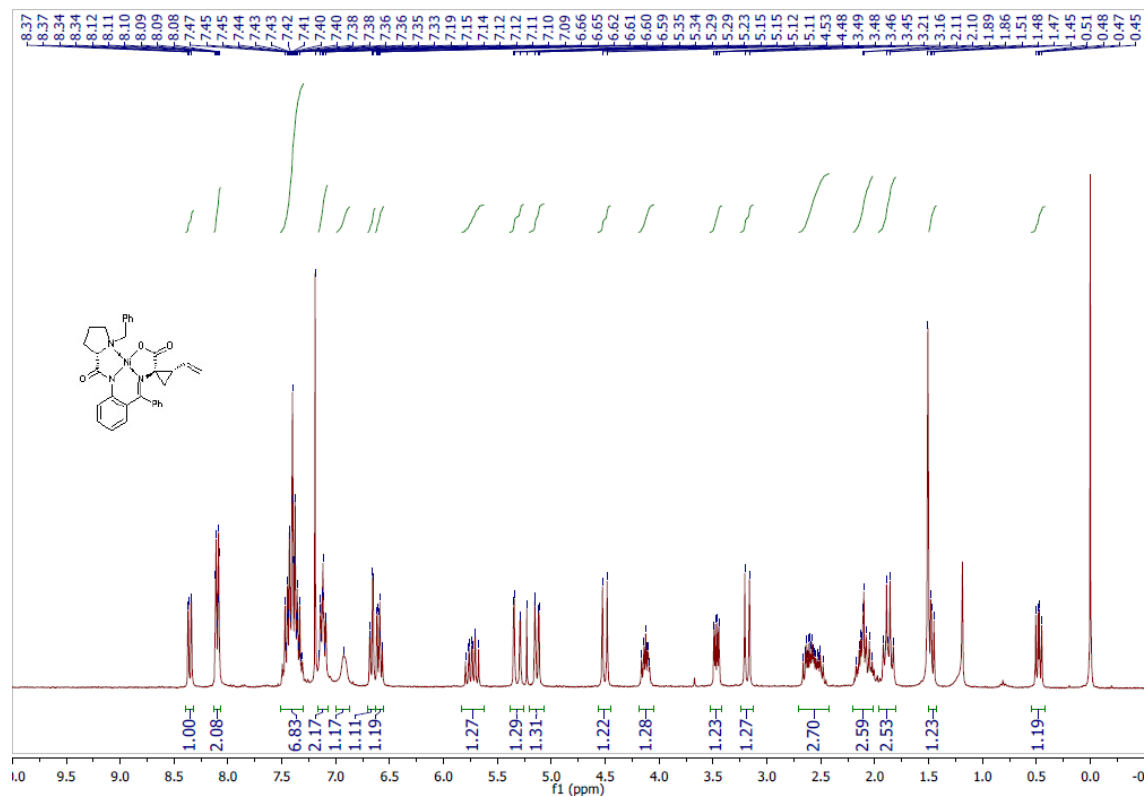

$^{13}\text{C}$  NMR of (*S*)(2*R*,3*S*)-**12** (75.5 MHz,  $\text{CDCl}_3$ ):

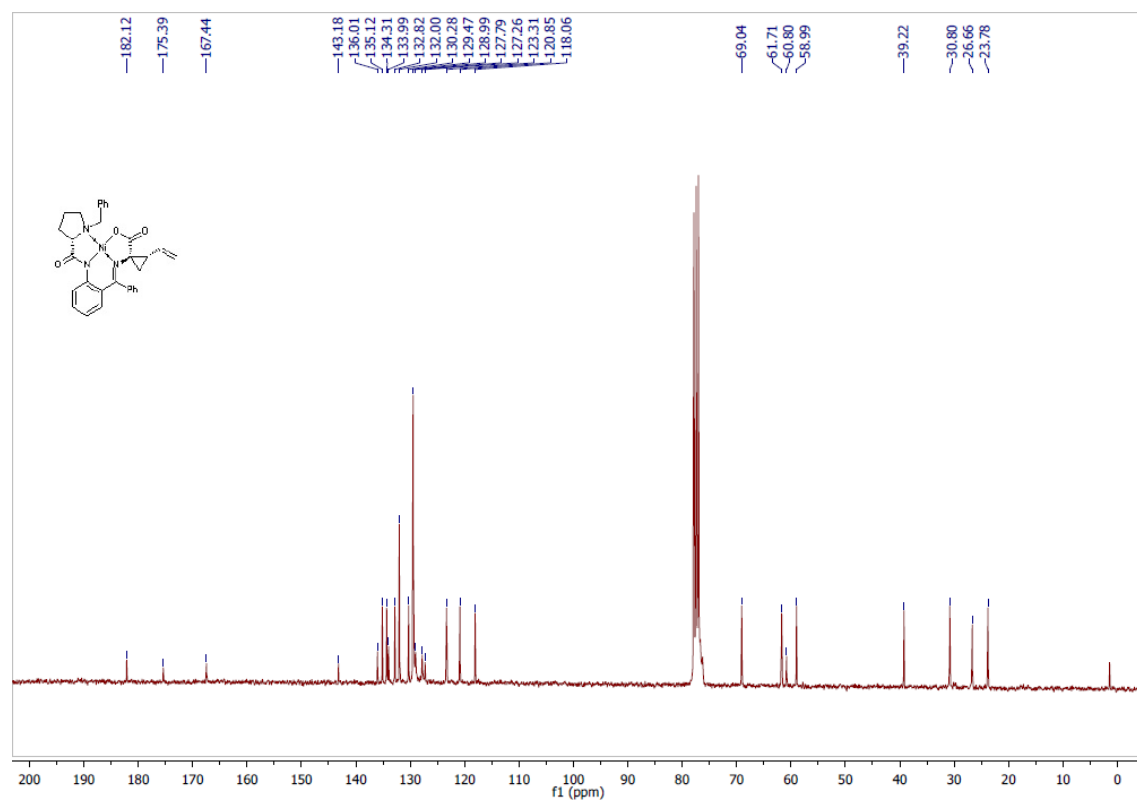

$^1\text{H}$  NMR of (*R*)(2*R*,3*S*)-**11** (300 MHz,  $\text{CDCl}_3$ ):

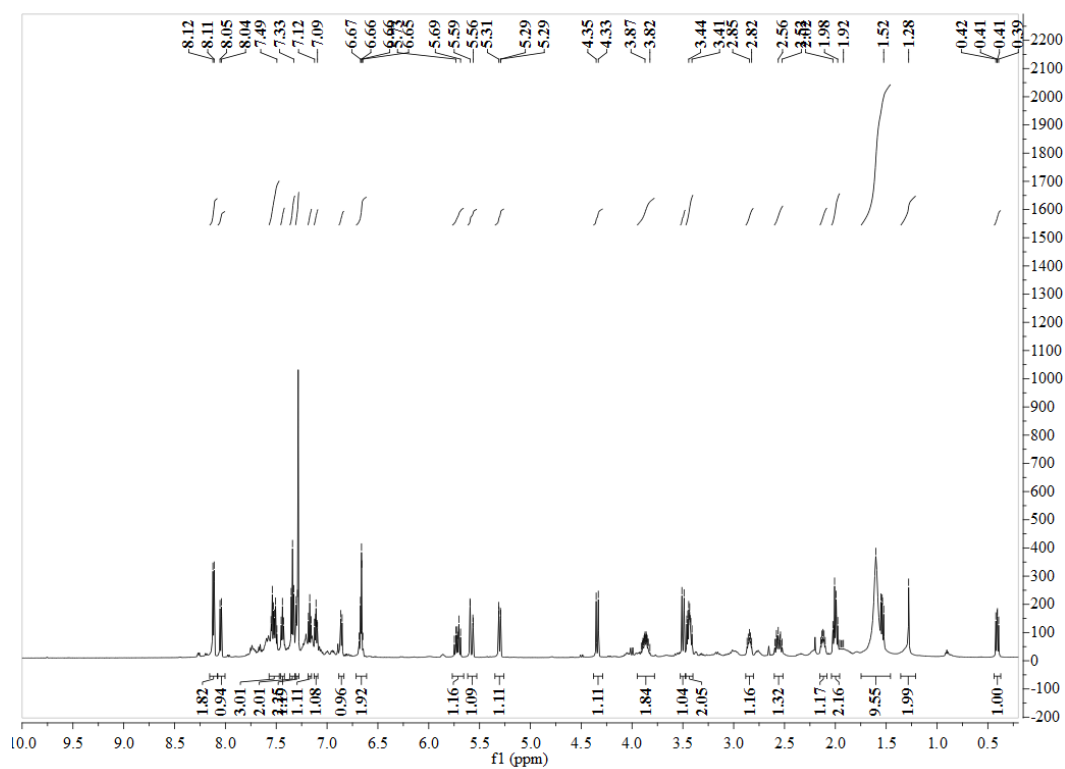

$^{13}\text{C}$  NMR of (*R*)(2*R*,3*S*)-**11** (75.5 MHz,  $\text{CDCl}_3$ ):

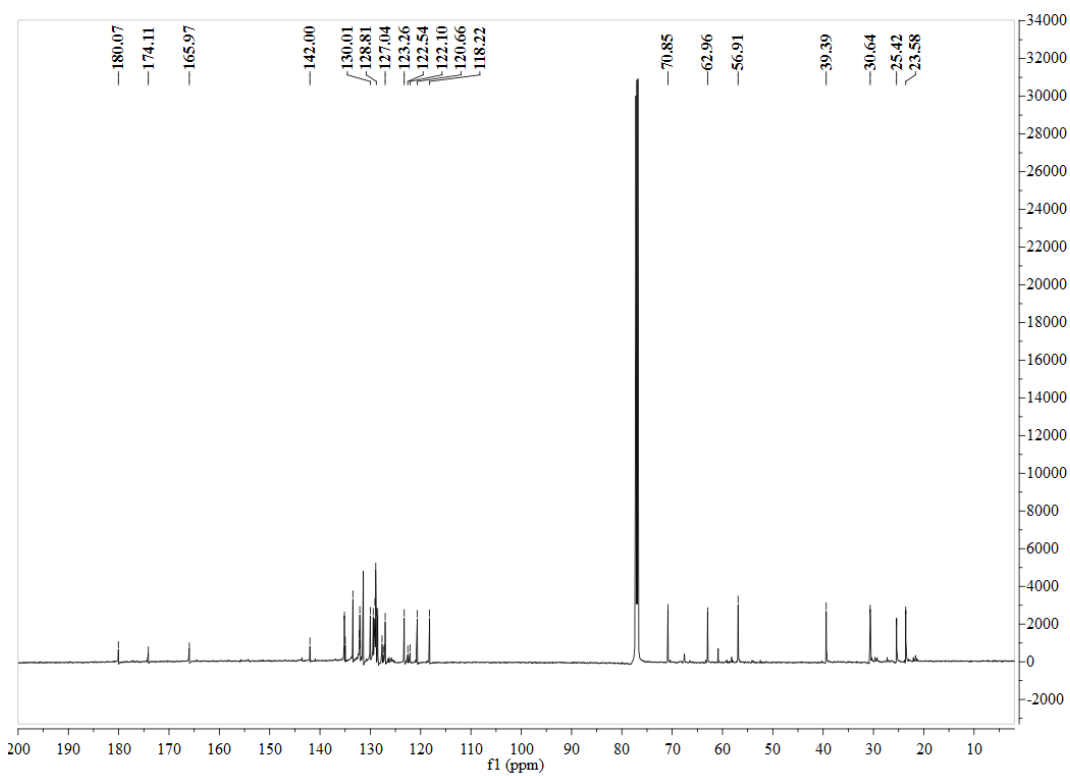

$^1\text{H}$  NMR of (*R*)(2*S*,3*R*)-**12** (300 MHz,  $\text{CDCl}_3$ ):

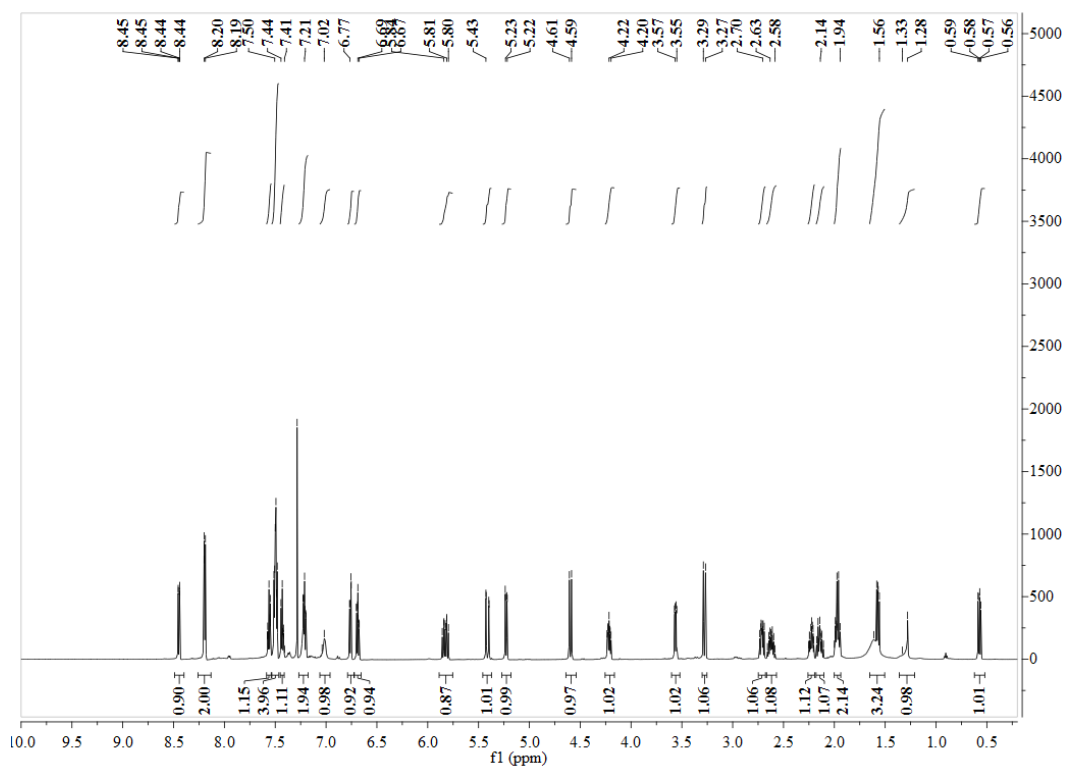

$^{13}\text{C}$  NMR of (*R*)(2*S*,3*R*)-**12** (75.5 MHz,  $\text{CDCl}_3$ ):

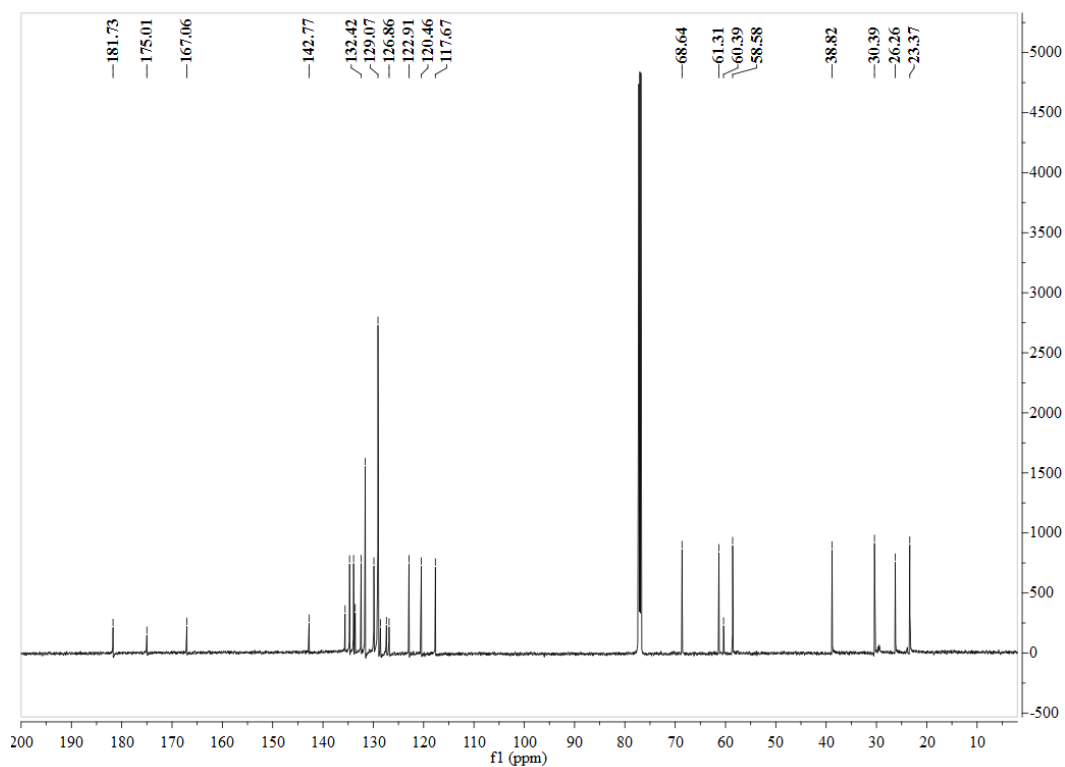

<sup>1</sup>H NMR of (1*R*,2*S*)-**14** (200 MHz, CD<sub>3</sub>OD):

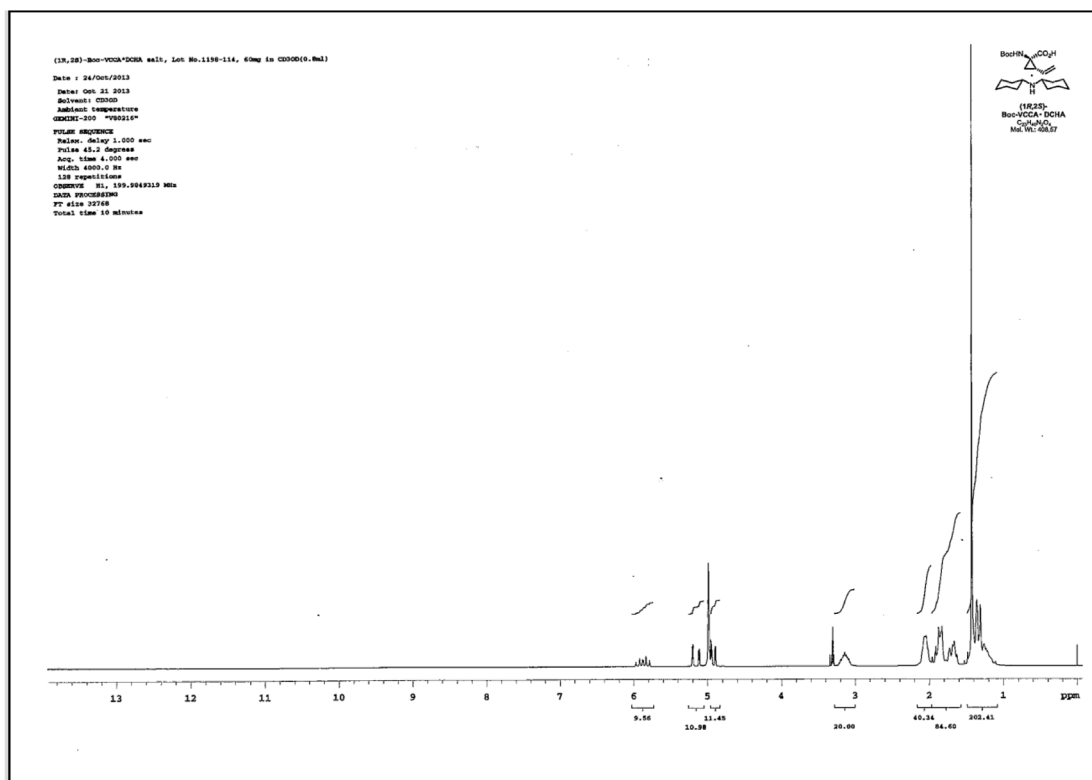

<sup>13</sup>C NMR of (1*R*,2*S*)-**14** (50.3 MHz, CD<sub>3</sub>OD):

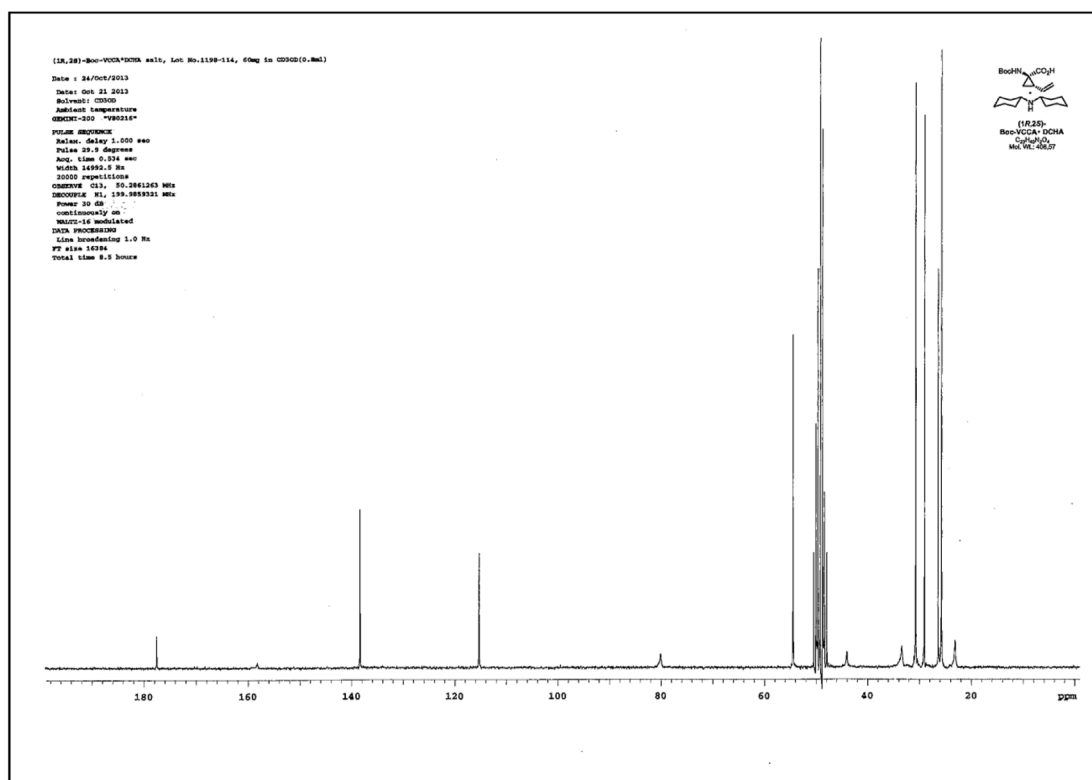



$^1\text{H}$  NMR of (1*R*,2*S*)-**15** (300 MHz,  $\text{CD}_3\text{Cl}_3$ ):

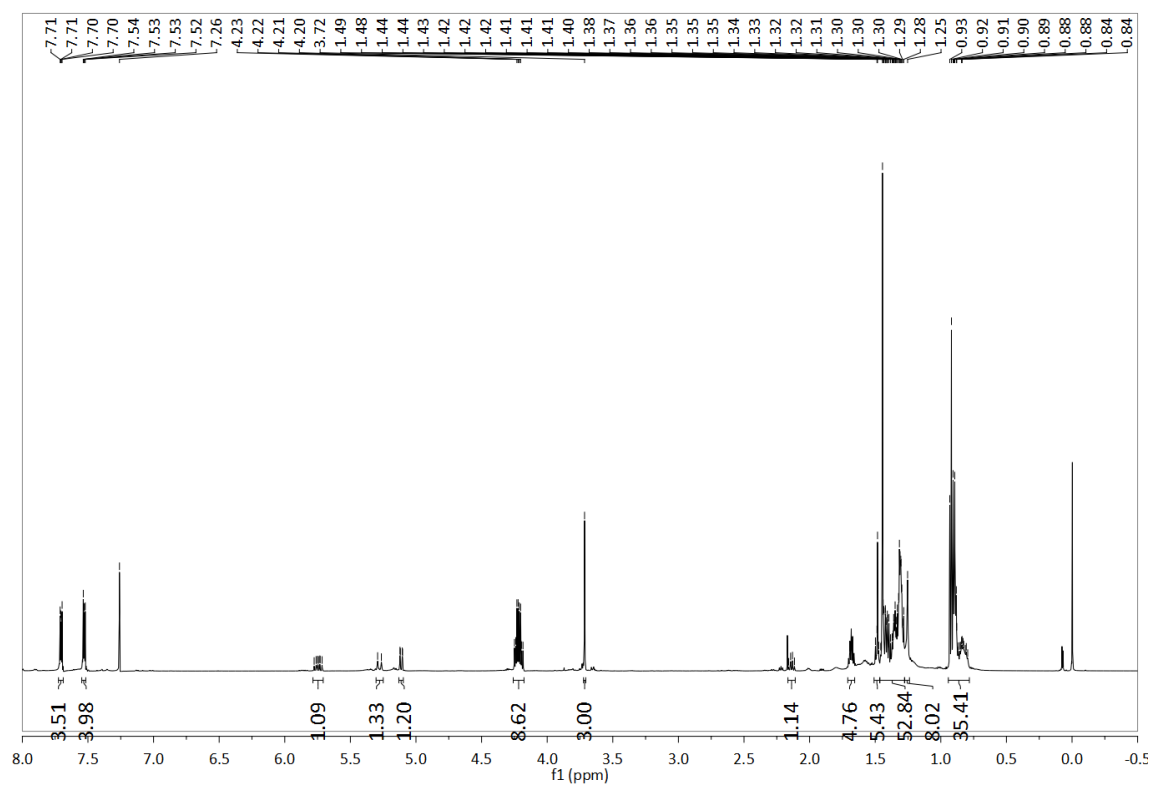

$^{13}\text{C}$  NMR of (1*R*,2*S*)-**15** (75.5 MHz,  $\text{CD}_3\text{Cl}_3$ ):

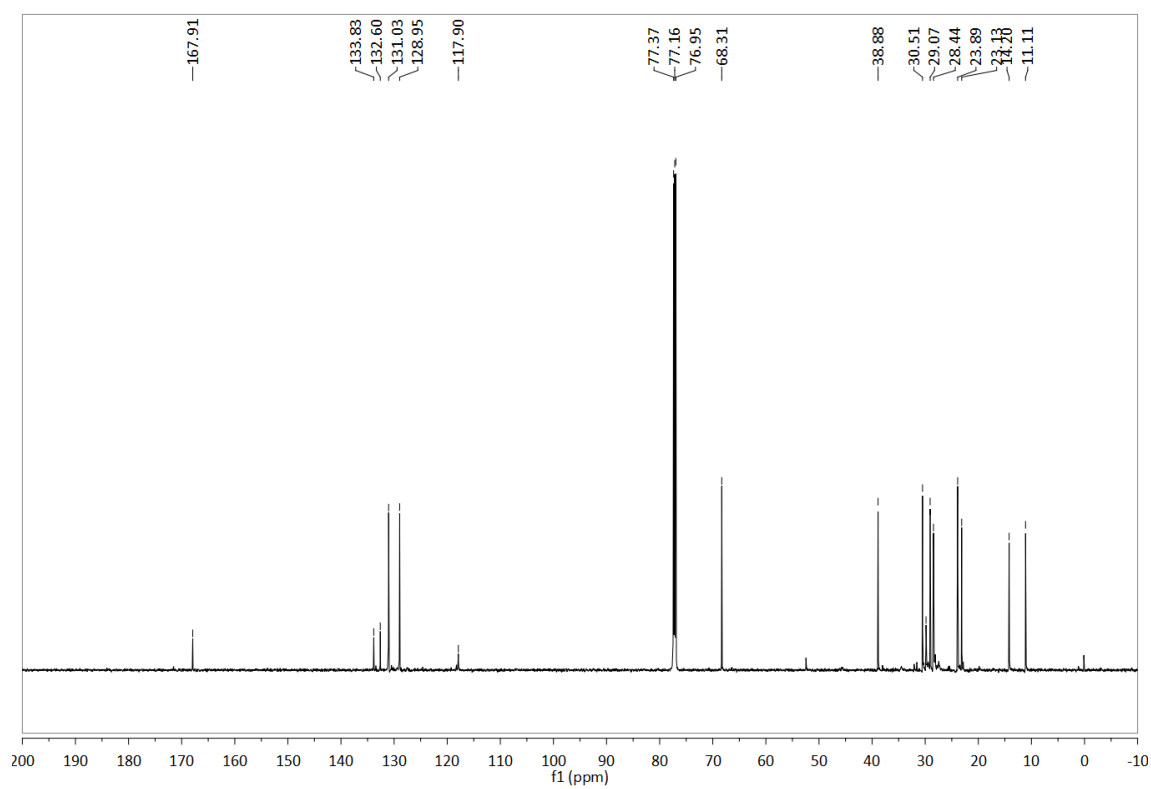

# HPLC analysis of (1*R*,2*S*)-15:

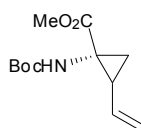

## ==== Shimazu Labsolution 分析レポート ====

分析日時 : 2013/06/27 13:09:03  
 メソッドファイル : CIBP-光学純度-A1cm  
 データファイル : 130627\_sample\_1R2S-N-BOC-vinyl ACCA-OMe 解析1.lcd  
 サンプル名 : sample\_1R2S-N-BOC-vinyl ACCA-OMe  
 サンプルID : 25°C, 0.75mL/min, 10.1mg/ 10mL  
 注入量 : 10 uL

### <クロマトグラム>

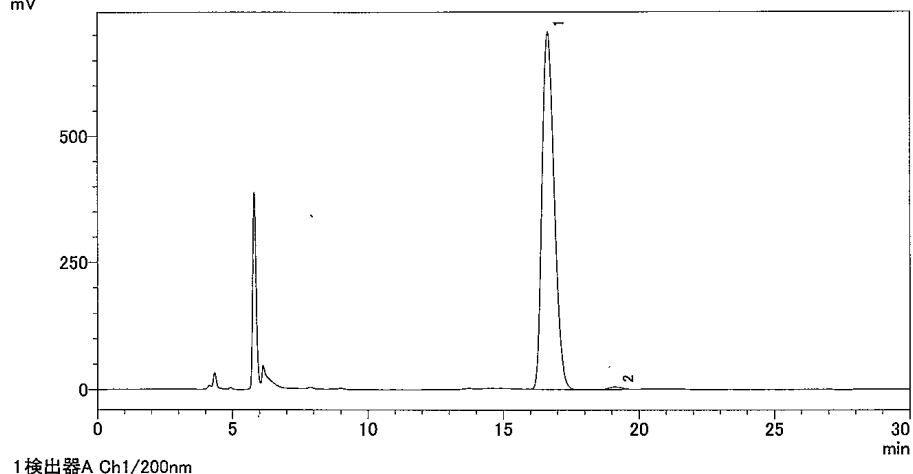

### <ピークテーブル>

検出器A Ch1 200nm

| ピーク# | 保持時間   | 面積       | 高さ     | 面積%     | 高さ%     | マーク | 化合物名 |
|------|--------|----------|--------|---------|---------|-----|------|
| 1    | 16.637 | 22035009 | 705413 | 99.201  | 99.276  |     | 1R2S |
| 2    | 19.174 | 177425   | 5145   | 0.799   | 0.724   |     | 1S2R |
| 合計   |        | 22212433 | 710558 | 100.000 | 100.000 |     |      |
